# Supplementary material for: Chronic Exposure to Endocrine Disruptor Vinclozolin Leads to Lung Damage via Nrf2–Nf-kb Pathway Alterations
Source: MDPI journal article supplement (doi:10.3390/ijms231911320), 2022-09-26
Supplement: s1 [file ijms-1898858-supplementary.pdf › ijms-1898858-supplementary.pdf]

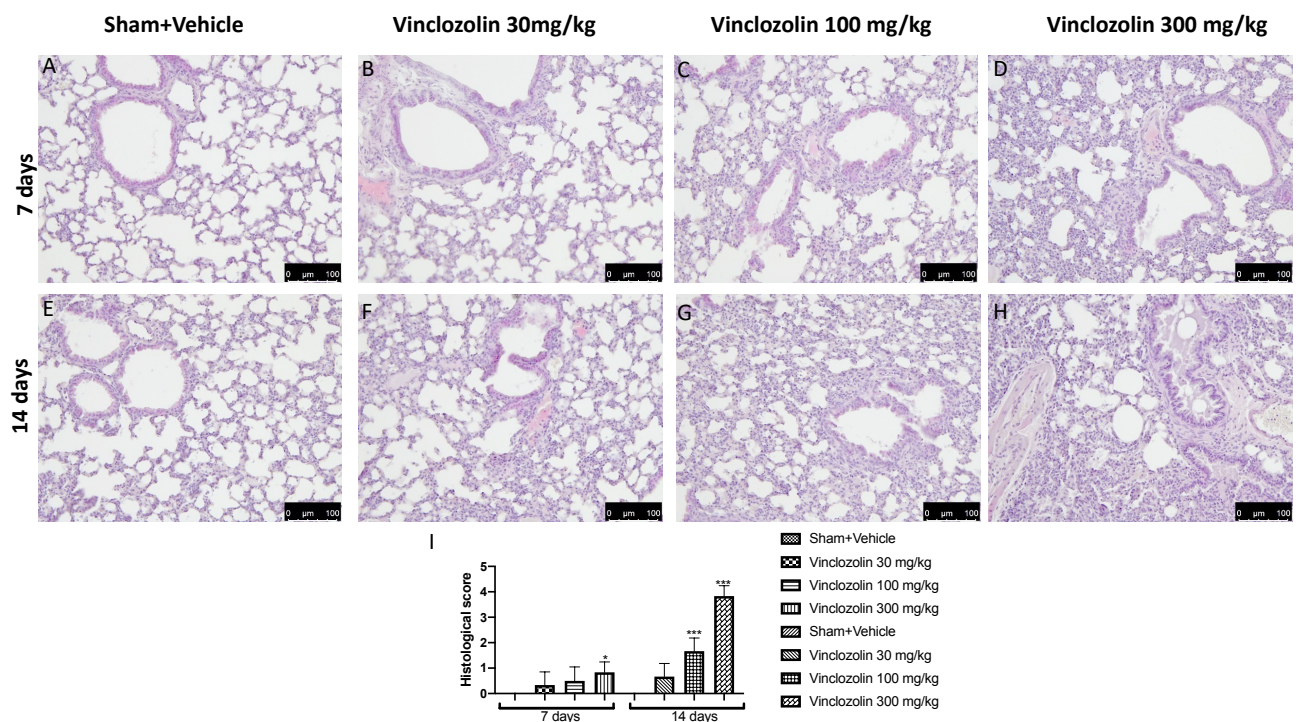

**Supplementary Figure S1.** Histological analysis of short term exposure of Vinclozolin at different concentration. 7 days for (A) Sham; (B) Vinclozolin 30 mg/kg; (C) Vinclozolin 100 mg/kg; (D) Vinclozolin 300 mg/kg; 14 days for (E) Sham; (F) Vinclozolin 30 mg/kg; (G) Vinclozolin 100 mg/kg; (H) Vinclozolin 300 mg/kg; (I) Histological Score . Values are means  $\pm$  SEM of 6 mice for all group. Images shown is representative of the results obtained. See manuscript for further details. \*\*\*  $p < 0.001$  vs. sham.
